# Supplementary material
Source: Springer Nature journal article supplement (https://www.springermedizin.de/resource/supplementary/12916_2009_214_MOESM5_ESM.pdf/9599408)

**Id, Sex, Study name**

**Relative Risk  
95% CI**

**Relative Risk  
95% CI**

**USA**

**1 M Lutheran Brotherhood**

**1.70 (0.90, 3.10)**

**11 M Williams and Horm 1977**

**0.29 (0.09, 0.92)**

**16 M Muscat et al 1997**

**2.82 (0.85, 9.39)**

**18 M+F Alguacil and Silverman 2004**

**1.10 (0.40, 3.10)**

**23 M+F Hassan et al 2007**

**0.65 (0.43, 0.97)**

**Subtotal (95% CI)**

**0.99 (0.51, 1.91)**

**SCANDINAVIA**

**5 M Norway Cohorts**

**1.67 (1.12, 2.50)**

**7 M Swedish construction workers**

**0.90 (0.70, 1.20)**

**Subtotal (95% CI)**

**1.20 (0.66, 2.20)**

**Total (95% CI)**

**1.07 (0.71, 1.60)**

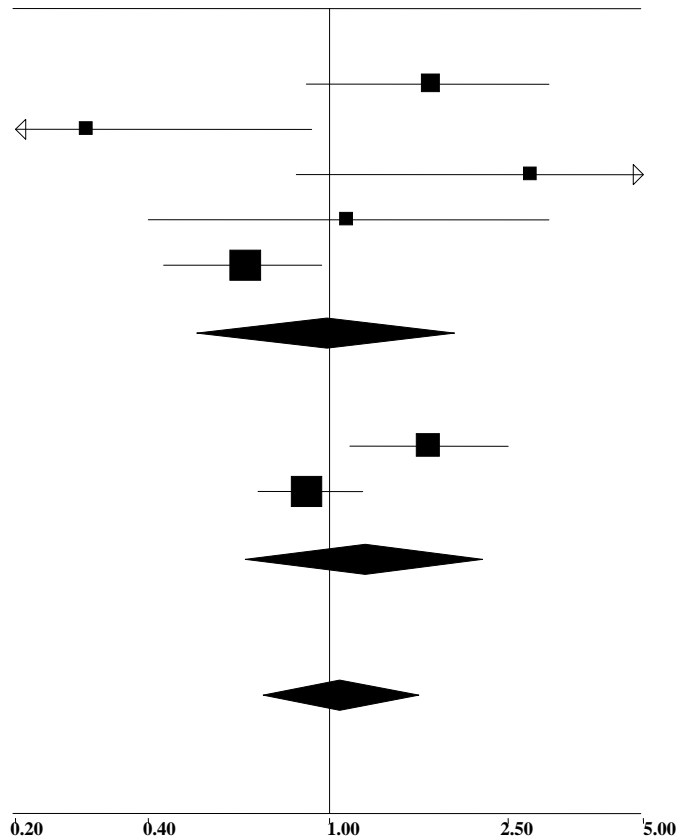

Supplement: MOESM5 [file 9599408]
